# Supplementary material
Source: PubMed Central journal article supplement (PMC4027629)
Supplement: ml400292s_si_001.pdf [file ml400292s_si_001.pdf]

# Evaluation and Structural Basis for the Inhibition of Tankyrases by PARP inhibitors

Teemu Haikarainen<sup>1,‡</sup>, Mohit Narwal<sup>1,2,‡</sup>, Päivi Joensuu<sup>3</sup>, & Lari Lehtiö<sup>1,\*</sup>

<sup>1</sup>Biocenter Oulu, Department of Biochemistry, University of Oulu, Oulu, Finland

<sup>2</sup>Pharmaceutical Sciences, Department of Biosciences, Abo Akademi University, Turku, Finland

<sup>3</sup>Department of Chemistry, University of Oulu, Oulu, Finland

## Content:

**Experimental procedures** contains details of the used proteins, assays and crystallization

**Supplementary Table 1** contains details of the compound library.

**Supplementary Table 2** contains details of the crystallographic data and refinement.

## EXPERIMENTAL PROCEDURES

**Chemical collection.** Tested compounds were purchased from Alexis Biochemicals, Sigma-Aldrich, Calbiochem, JS Research Chemicals Trading, Maybridge and Selleck Biochemicals. Details of the tested compounds are provided in Supplementary Table 1. The purity of all the compounds was  $\geq 95\%$  based on GC, HPLC, NMR or TLC analysis by the suppliers. When such information was not available, the compounds were identified and the purity was verified with HPLC.

**Protein Expression.** The expression and purification of ARTD5 (residues 1030-1317) and ARTD6 (residues 873-1161) for biochemical assays and ARTD6 (residues 946-1162) for crystallography was carried out as previously reported.<sup>1-3</sup>

**Activity assay.** Enzymatic assays were conducted as reported earlier using automodification reaction of tankyrases with 500 nM NAD<sup>+</sup> as a substrate.<sup>1</sup> Compounds were screened at 10  $\mu$ M and 500 nM concentrations in triplicate and the best compounds were selected for further studies. The dose response curves were measured for the selected compounds. The observed fluorescence values were used for fitting or when intrinsic compound fluorescence was observed at high concentrations the fluorescence was normalized to a conversion percentage using the controls. The data points were measured in quadruplicate and all IC<sub>50</sub> values were measured at least three times and fitted individually.

**Crystallization, Data collection and Refinement.** The ARTD6 catalytic domain was crystallized as previously reported.<sup>2</sup> The crystals were soaked in the precipitant solution supplemented with 250 mM NaCl and the inhibitors (**16**, **18**: 100  $\mu$ M, **10**: 1 mM, **17**: 5 mM or **29**: 10 mM). Crystals were incubated for 24 hours (**16**, **17**, **18**) or 90 days (**10**, **29**) and were dipped into a cryosolution containing additional 20% glycerol and 250 mM NaCl before flash cooling in liquid nitrogen. Data and refinement statistics are shown in Supplementary Table 2.

**Supplementary Table 1.** PARP inhibitor like compounds tested.

| No.              | Compound names                                        | SMILES                                                                                               | Supplier               |
|------------------|-------------------------------------------------------|------------------------------------------------------------------------------------------------------|------------------------|
| 1 <sup>4</sup>   | 3AB                                                   | <chem>NC(=O)c1cccc(N)c1</chem>                                                                       | Alexis<br>Biochemicals |
| 2 <sup>5</sup>   | Niacinamide,<br>Nicotinamide                          | <chem>NC(=O)c1cccnc1</chem>                                                                          | Alexis<br>Biochemicals |
| 3 <sup>4</sup>   | Benzamide                                             | <chem>NC(=O)c1ccccc1</chem>                                                                          | Alexis<br>Biochemicals |
| 4 <sup>6</sup>   | Veliparib, ABT-888                                    | <chem>C[C@@]1(CCCN1)c1nc2c(cccc2[nH]1)C(N)=O</chem>                                                  | Alexis<br>Biochemicals |
| 5 <sup>7</sup>   | 5-aminoisoquinolinone,<br>5-AIQ                       | <chem>Nc1cccc2c1cc[nH]c2=O</chem>                                                                    | Alexis<br>Biochemicals |
| 6*               | 3-methyl-5-<br>aminoisoquinolinone,<br>3-methyl-5-AIQ | <chem>Cc1cc2c(N)cccc2c(=O)[nH]1</chem>                                                               | Alexis<br>Biochemicals |
| 7 <sup>5</sup>   | 4-amino-1,8-<br>naphthalimide, 4-ANI                  | <chem>Nc1ccc2C(=O)NC(=O)c3cccc1c23</chem>                                                            | Alexis<br>Biochemicals |
| 8 <sup>7</sup>   | DPQ                                                   | <chem>O=C1NCCc2c(OCCCCN3CCCCC3)cccc12</chem>                                                         | Alexis<br>Biochemicals |
| 9 <sup>8</sup>   | DR2313                                                | <chem>Cc1nc(=O)c2CSCCc2[nH]1</chem>                                                                  | Alexis<br>Biochemicals |
| 10 <sup>9</sup>  | EB-47                                                 | <chem>Nc1ncnc2n(cnc12)[C@@H]1O[C@@H]([C@@H](O)[C@H]1O)C(=O)N1CCN(CC(=O)Nc2cccc3C(=O)NCc23)CC1</chem> | Alexis<br>Biochemicals |
| 11 <sup>5</sup>  | 4-Hydroxyquinazoline,<br>4-HQN                        | <chem>O=c1nc[nH]c2ccccc12</chem>                                                                     | Alexis<br>Biochemicals |
| 12 <sup>10</sup> | INH2BP                                                | <chem>Nc1ccc2oc(=O)ccc2c1</chem>                                                                     | Alexis<br>Biochemicals |
| 13 <sup>5</sup>  | 1,5-Isoquinolinediol,<br>DHQ                          | <chem>Oc1cccc2c1cc[nH]c2=O</chem>                                                                    | Alexis<br>Biochemicals |
| 14 <sup>11</sup> | Minocin, Minocycline                                  | <chem>CN(C)[C@H]1[C@@H]2C[C@@H]3Cc4c(ccc(O)c4C(O)=C3C(=O)[C@]2(O)C(=O)C(=C(/N)O)C1=O)N(C)C</chem>    | Alexis<br>Biochemicals |
| 15 <sup>12</sup> | NU1025                                                | <chem>Cc1nc(=O)c2ccc(O)c2[nH]1</chem>                                                                | Alexis<br>Biochemicals |
| 16 <sup>5</sup>  | Phenanthridinone                                      | <chem>O=c1[nH]c2ccccc2c2ccccc12</chem>                                                               | Alexis<br>Biochemicals |
| 17 <sup>13</sup> | PJ-34                                                 | <chem>CN(C)CC(=O)Nc1ccc2[nH]c(=O)c3ccccc3c2c1</chem>                                                 | Alexis<br>Biochemicals |
| 18 <sup>14</sup> | TIQ-A                                                 | <chem>O=c1[nH]c2sccc2c2ccccc12</chem>                                                                | Alexis<br>Biochemicals |
| 19 <sup>15</sup> | Paraxanthine, 1,7-<br>dimethylxanthine                | <chem>Cn1cnc2[nH]c(=O)n(C)c(=O)c12</chem>                                                            | Sigma-Aldrich          |
| 20 <sup>16</sup> | CNQ                                                   | <chem>NC(=O)c1cccc2ncc(nc12)-c1ccc(Cl)cc1</chem>                                                     | Calbiochem             |

| No.              | Compound names                 | SMILES                                                                                 | Supplier                      |
|------------------|--------------------------------|----------------------------------------------------------------------------------------|-------------------------------|
| 21 <sup>17</sup> | Olaparib, KU-0059436, AZD-2281 | <chem>Fc1ccc(Cc2n[nH]c(=O)c3ccccc23)cc1C(=O)N1CCN(CC1)C(=O)C1CC1</chem>                | JS Research Chemicals Trading |
| 22 <sup>18</sup> | BYK204165                      | <chem>Cn1cccc1\C=C1/C(=O)NC(=O)c2ccccc12</chem>                                        | Sigma-Aldrich                 |
| 23 <sup>19</sup> | XAV939                         | <chem>FC(F)(F)c1ccc(cc1)-c1nc(=O)c2CSCCc2[nH]1</chem>                                  | Maybridge                     |
| 24 <sup>8</sup>  | RF03877                        | <chem>Oc1nc(nc2CCSCc12)-c1cccn1</chem>                                                 | Maybridge                     |
| 25 <sup>20</sup> | RF03876                        | <chem>Oc1nc(nc2CCSCc12)C1CC1</chem>                                                    | Maybridge                     |
| 26 <sup>21</sup> | IWR-1                          | <chem>O=C(Nc1cccc2cccnc12)c1ccc(cc1)N1C(=O)[C@H]2[C@@H]3C[C@@H](C=C3)[C@H]2C1=O</chem> | Sigma-Aldrich                 |
| 27 <sup>21</sup> | IWP-2                          | <chem>Cc1ccc2nc(NC(=O)CSc3nc4CCSc4c(=O)n3-c3ccccc3)sc2c1</chem>                        | Sigma-Aldrich                 |
| 28 <sup>22</sup> | Iniparib, BSI-201              | <chem>NC(=O)c1ccc(l)c(c1)N(=O)=O</chem>                                                | Selleck Biochemicals          |
| 29 <sup>23</sup> | AG014699, Rucaparib            | <chem>CNCc1ccc(cc1)-c1[nH]c2cc(F)cc3C(=O)NCCc1c23</chem>                               | Selleck Biochemicals          |
| 30 <sup>24</sup> | UPF1035                        | <chem>O=C(Oc1cccc2c1cc[nH]c2=O)c1ccccc1</chem>                                         | Alexis Biochemicals           |
| 31 <sup>24</sup> | UPF1069                        | <chem>O=C(COc1cccc2c1cc[nH]c2=O)c1ccccc1</chem>                                        | Alexis Biochemicals           |
| 32 <sup>5</sup>  | Flavone                        | <chem>O=c1cc(oc2ccccc12)-c1ccccc1</chem>                                               | Sigma-Aldrich                 |

**Supplementary Table 2.** Data and refinement statistics.

| <b>Compound</b>                       | <b>10</b>               | <b>16</b>               | <b>17</b>                         | <b>18</b>               | <b>29</b>                         |
|---------------------------------------|-------------------------|-------------------------|-----------------------------------|-------------------------|-----------------------------------|
| <b>PDB code</b>                       | 4BJ9                    | 4AVU                    | 4BJB                              | 4AVW                    | 4BJC                              |
| <b>Data quality</b>                   |                         |                         |                                   |                         |                                   |
| Beamline                              | Diamond I04-1           | ESRF ID14-1             | ESRF ID23-2                       | ESRF ID14-1             | Diamond I04-1                     |
| Wavelength (Å)                        | 0.92                    | 0.93340                 | 0.87260                           | 0.93340                 | 0.92                              |
| Space group                           | C222 <sub>1</sub>       | C222 <sub>1</sub>       | P 4 <sub>1</sub> 2 <sub>1</sub> 2 | C222 <sub>1</sub>       | P 4 <sub>1</sub> 2 <sub>1</sub> 2 |
| Cell dimensions a, b, c (Å)           | 90.56, 97.78,<br>120.03 | 93.37, 96.69,<br>116.33 | 66.33, 66.33,<br>121.39           | 91.57, 97.99,<br>117.95 | 65.30, 65.30,<br>122.91           |
| Resolution (Å)                        | 30-2.05<br>(2.10-2.05)  | 67- 2.40<br>(2.46-2.40) | 30-2.30<br>(2.36-2.30)            | 67- 2.15<br>(2.21-2.15) | 30-2.20<br>(2.26-2-20)            |
| R <sub>merge</sub>                    | 0.091 (0.742)           | 0.126 (0.587)           | 0.123 (1.032)                     | 0.115 (0.579)           | 0.111 (0.879)                     |
| I / σI                                | 13.1 (2.3)              | 9.7 (2.4)               | 18.0 (3.0)                        | 10.2 (2.4)              | 15.6 (2.6)                        |
| Completeness (%)                      | 99.8 (99.8)             | 99.7 (99.7)             | 99.9 (100.0)                      | 99.2 (98.9)             | 98.6 (99.4)                       |
| Redundancy                            | 6.4 (6.0)               | 3.7 (3.7)               | 10.2 (10.5)                       | 3.7 (3.7)               | 12.6 (12.0)                       |
| CC1/2 (%)                             | 99.8 (75.4)             | 99.1 (71.7)             | 99.8 (86.1)                       | 99.3 (73.3)             | 99.9 (83.4)                       |
| <b>Refinement</b>                     |                         |                         |                                   |                         |                                   |
| Reflections                           | 32035                   | 19819                   | 12007                             | 27534                   | 13240                             |
| R <sub>work</sub> / R <sub>free</sub> | 0.171 / 0.197           | 0.182 / 0.244           | 0.199 / 0.255                     | 0.187 / 0.228           | 0.195 / 0.247                     |
| <b>B-factors</b>                      |                         |                         |                                   |                         |                                   |
| Protein                               | 35.2                    | 20.8                    | 39.9                              | 20.6                    | 43.3                              |
| Compound                              | 54.9                    | 16.7                    | 53.0                              | 13.9                    | 41.4                              |
| Zn                                    | 32.7                    | 20.3                    | 41.0                              | 19.9                    | 42.0                              |
| SO <sub>4</sub>                       | 45.0                    | 31.8                    | 49.9                              | 33.5                    | 69.6                              |
| Water                                 | 40.6                    | 18.8                    | 37.7                              | 21.6                    | 44.5                              |
| Glycerol                              | 37.4                    | 35.7                    | 46.3                              | 24.4                    | -                                 |
| PEG                                   | -                       | 45.9                    | -                                 | 43.4                    | -                                 |
| <b>R.m.s.d.</b>                       |                         |                         |                                   |                         |                                   |
| Bond lengths (Å)                      | 0.010                   | 0.012                   | 0.005                             | 0.011                   | 0.005                             |
| Bond angles (°)                       | 1.4                     | 1.5                     | 1.0                               | 1.5                     | 1.0                               |
| <b>Ramachandran plot</b>              |                         |                         |                                   |                         |                                   |
| Most favorable regions (%)            | 98.0                    | 98.0                    | 96.4                              | 98.0                    | 97.4                              |
| Additionally allowed regions (%)      | 2.0                     | 2.0                     | 3.6                               | 2.0                     | 2.6                               |

## REFERENCES

- (1) Narwal, M.; Fallarero, A.; Vuorela, P.; Lehtiö, L. Homogeneous Screening Assay for Human Tankyrase. *J. Biomol. Screen.* **2012**, *17*, 593–604.
- (2) Narwal, M.; Venkannagari, H.; Lehtiö, L. Structural Basis of Selective Inhibition of Human Tankyrases. *J. Med. Chem.* **2012**, *55*, 1360–1367.
- (3) Narwal, M.; Koivunen, J.; Haikarainen, T.; Obaji, E.; Legala, O. E.; Venkannagari, H.; Joensuu, P.; Pihlajaniemi, T.; Lehtiö, L. Discovery of Tankyrase Inhibiting Flavones with Increased Potency and Isoenzyme Selectivity. *J. Med. Chem.* **2013**, doi: 10.1021/jm401463y.
- (4) Purnell, M. R.; Whish, W. J. Novel Inhibitors of poly(ADP-Ribose) Synthetase. *Biochem. J.* **1980**, *185*, 775–777.
- (5) Banasik, M.; Komura, H.; Shimoyama, M.; Ueda, K. Specific Inhibitors of poly(ADP-Ribose) Synthetase and mono(ADP-Ribosyl)transferase. *J. Biol. Chem.* **1992**, *267*, 1569–1575.
- (6) Penning, T. D.; Zhu, G.-D.; Gandhi, V. B.; Gong, J.; Liu, X.; Shi, Y.; Klinghofer, V.; Johnson, E. F.; Donawho, C. K.; Frost, D. J.; et al. Discovery of the Poly(ADP-Ribose) Polymerase (PARP) Inhibitor 2-[(R)-2-Methylpyrrolidin-2-Yl]-1H-Benzimidazole-4-Carboxamide (ABT-888) for the Treatment of Cancer. *J. Med. Chem.* **2009**, *52*, 514–523.
- (7) Suto, M. J.; Turner, W. R.; Arundel-Suto, C. M.; Werbel, L. M.; Sebolt-Leopold, J. S. Dihydroisoquinolinones: The Design and Synthesis of a New Series of Potent Inhibitors of poly(ADP-Ribose) Polymerase. *Anticancer Drug Des.* **1991**, *6*, 107–117.
- (8) Nakajima, H.; Kakui, N.; Ohkuma, K.; Ishikawa, M.; Hasegawa, T. A Newly Synthesized poly(ADP-Ribose) Polymerase Inhibitor, DR2313 [2-Methyl-3,5,7,8-tetrahydrothiopyrano[4,3-D]-Pyrimidine-4-One]: Pharmacological Profiles, Neuroprotective Effects, and Therapeutic Time Window in Cerebral Ischemia in Rats. *J. Pharmacol. Exp. Ther.* **2005**, *312*, 472–481.
- (9) Jagtap, P. G.; Southan, G. J.; Baloglu, E.; Ram, S.; Mabley, J. G.; Marton, A.; Salzman, A.; Szabó, C. The Discovery and Synthesis of Novel Adenosine Substituted 2,3-Dihydro-1H-Isindol-1-Ones: Potent Inhibitors of poly(ADP-Ribose) Polymerase-1 (PARP-1). *Bioorg. Med. Chem. Lett.* **2004**, *14*, 81–85.
- (10) Bauer, P. I.; Kirsten, E.; Varadi, G.; Young, L. J.; Hakam, A.; Comstock, J. A.; Kun, E. Reversion of Malignant Phenotype by 5-Iodo-6-Amino-1,2-Benzopyrone a Non-Covalently Binding Ligand of poly(ADP-Ribose) Polymerase. *Biochimie* **1995**, *77*, 374–377.
- (11) Alano, C. C.; Kauppinen, T. M.; Valls, A. V.; Swanson, R. A. Minocycline Inhibits poly(ADP-Ribose) Polymerase-1 at Nanomolar Concentrations. *Proc. Natl. Acad. Sci. U. S. A.* **2006**, *103*, 9685–9690.
- (12) Griffin, R. J.; Pemberton, L. C.; Rhodes, D.; Bleasdale, C.; Bowman, K.; Calvert, A. H.; Curtin, N. J.; Durkacz, B. W.; Newell, D. R.; Porteous, J. K. Novel Potent Inhibitors of the DNA Repair Enzyme poly(ADP-Ribose)polymerase (PARP). *Anticancer. Drug Des.* **1995**, *10*, 507–514.
- (13) Jagtap, P.; Soriano, F. G.; Virag, L.; Liaudet, L.; Mabley, J.; Szabo, E.; Hasko, G.; Marton, A.; Lorigados, C. B.; Gallyas, F.; et al. Novel Phenanthridinone Inhibitors of Poly (adenosine 5'-Diphosphate-Ribose) Synthetase: Potent Cytoprotective and Antishock Agents. *Crit. Care Med.* **2002**, *30*, 1071–1082.
- (14) Chiarugi, A.; Meli, E.; Calvani, M.; Picca, R.; Baronti, R.; Camaioni, E.; Costantino, G.; Marinozzi, M.; Pellegrini-Giampietro, D. E.; Pellicciari, R.; et al. Novel Isoquinolinone-

Derived Inhibitors of poly(ADP-Ribose) Polymerase-1: Pharmacological Characterization and Neuroprotective Effects in an in Vitro Model of Cerebral Ischemia. *J. Pharmacol. Exp. Ther.* **2003**, *305*, 943–949.

- (15) Geraets, L.; Moonen, H. J. J.; Wouters, E. F. M.; Bast, A.; Hageman, G. J. Caffeine Metabolites Are Inhibitors of the Nuclear Enzyme poly(ADP-Ribose)polymerase-1 at Physiological Concentrations. *Biochem. Pharmacol.* **2006**, *72*, 902–910.
- (16) Iwashita, A.; Hattori, K.; Yamamoto, H.; Ishida, J.; Kido, Y.; Kamijo, K.; Murano, K.; Miyake, H.; Kinoshita, T.; Warizaya, M.; et al. Discovery of Quinazolinone and Quinoxaline Derivatives as Potent and Selective poly(ADP-Ribose) Polymerase-1/2 Inhibitors. *FEBS Lett.* **2005**, *579*, 1389–93.
- (17) Menear, K. A.; Adcock, C.; Boulter, R.; Cockcroft, X.; Copsey, L.; Cranston, A.; Dillon, K. J.; Drzewiecki, J.; Garman, S.; Gomez, S.; et al. 4-[3-(4-Cyclopropanecarbonylpiperazine-1-Carbonyl)-4-Fluorobenzyl]-2H-Phthalazin-1-One: A Novel Bioavailable Inhibitor of poly(ADP-Ribose) Polymerase-1. *J. Med. Chem.* **2008**, *51*, 6581–6591.
- (18) Eltze, T.; Boer, R.; Wagner, T.; Weinbrenner, S.; McDonald, M. C.; Thiemermann, C.; Bürkle, A.; Klein, T. Imidazoquinolinone, Imidazopyridine, and Isoquinolindione Derivatives as Novel and Potent Inhibitors of the poly(ADP-Ribose) Polymerase (PARP): A Comparison with Standard PARP Inhibitors. *Mol. Pharmacol.* **2008**, *74*, 1587–1598.
- (19) Huang, S.-M. A.; Mishina, Y. M.; Liu, S.; Cheung, A.; Stegmeier, F.; Michaud, G. A.; Charlat, O.; Wiellette, E.; Zhang, Y.; Wiessner, S.; et al. Tankyrase Inhibition Stabilizes Axin and Antagonizes Wnt Signalling. *Nature* **2009**, *461*, 614–620.
- (20) Vilchez Larrea, S. C.; Haikarainen, T.; Narwal, M.; Schlesinger, M.; Venkannagari, H.; Flawiá, M. M.; Villamil, S. H. F.; Lehtiö, L. Inhibition of poly(ADP-Ribose) Polymerase Interferes with Trypanosoma Cruzi Infection and Proliferation of the Parasite. *PloS One* **2012**, *7*, e46063.
- (21) Chen, B.; Dodge, M. E.; Tang, W.; Lu, J.; Ma, Z.; Fan, C.-W.; Wei, S.; Hao, W.; Kilgore, J.; Williams, N. S.; et al. Small Molecule-Mediated Disruption of Wnt-Dependent Signaling in Tissue Regeneration and Cancer. *Nat. Chem. Biol.* **2009**, *5*, 100–107.
- (22) Mendeleyev, J.; Kirsten, E.; Hakam, A.; Buki, K. G.; Kun, E. Potential Chemotherapeutic Activity of 4-Iodo-3-Nitrobenzamide. Metabolic Reduction to the 3-Nitroso Derivative and Induction of Cell Death in Tumor Cells in Culture. *Biochem. Pharmacol.* **1995**, *50*, 705–714.
- (23) Thomas, H. D.; Calabrese, C. R.; Batey, M. A.; Canan, S.; Hostomsky, Z.; Kyle, S.; Maegley, K. A.; Newell, D. R.; Skalitzky, D.; Wang, L.-Z.; et al. Preclinical Selection of a Novel poly(ADP-Ribose) Polymerase Inhibitor for Clinical Trial. *Mol. Cancer Ther.* **2007**, *6*, 945–956.
- (24) Pellicciari, R.; Camaioni, E.; Costantino, G.; Formentini, L.; Sabbatini, P.; Venturoni, F.; Eren, G.; Bellocchi, D.; Chiarugi, A.; Moroni, F. On the Way to Selective PARP-2 Inhibitors. Design, Synthesis, and Preliminary Evaluation of a Series of Isoquinolinone Derivatives. *ChemMedChem* **2008**, *3*, 914–923.

\* no reference in the literature. Commonly used reference: Woon, E.C.Y. et al. Synthesis and PARP-1 inhibitory activity of 3-substituted analogues of the potent water-soluble PARP inhibitor 5-aminoisoquinolin-1-one (5-AIQ): *Bioorg. Med. Chem.* **2006**, (submitted)

§ This study
